# Supplementary material
Source: PubMed Central journal article supplement (PMC5586564)
Supplement: CJN.00570117SupplementaryData.pdf [file CJN.00570117SupplementaryData.pdf]

Supplemental material is neither peer-reviewed nor thoroughly edited by CJASN. The authors alone are responsible for the accuracy and presentation of the material.

## **Supplemental Material**

**Supplemental Table 1:** List of antidepressant medication have been used for alternative diagnosis for depression

|                        |
|------------------------|
| <b>Antidepressants</b> |
| AMITRIPTYLINE          |
| BUPROPION              |
| CITALOPRAM             |
| CLOMIPRAMINE           |
| CYMBALTA               |
| DESIPRAMINE            |
| DESVENLAFAXINE         |
| DOXEPIN                |
| DULOXETINE             |
| FLUOXETINE             |
| FLUVOXAMINE            |
| IMIPRAMINE             |
| LEXAPRO                |
| MIRTAZAPINE            |
| NEFAZODONE             |
| NORTRIPTYLINE          |
| PAROXETINE             |
| PHENELZINE             |
| PROTRIPTYLINE          |
| SERTRALINE             |
| TRAZODONE              |
| TRIMIPRAMINE           |
| VENLAFAXINE            |

**Supplemental Table 2:** Proportion of missing baseline patient characteristics

|                                       | <b>Total</b>        | <b>Missing data<br/>N (%)</b> |
|---------------------------------------|---------------------|-------------------------------|
|                                       | <b>(N = 45,076)</b> | <b>N/A</b>                    |
| Age (years)                           | 72±11               | 0                             |
| Sex (male; %)                         | 95                  | 0                             |
| Race (African-American; %)            | 23                  | 66 (0)                        |
| Marital status (married; %)           | 58                  | 0                             |
| Body mass index (kg/m <sup>2</sup> )  | 29.9±6.6            | 22,699 (50)                   |
| Vascular access type (catheter; %)    | 78                  | 3,475 (8)                     |
| <b>Comorbid Conditions (%)</b>        |                     |                               |
| Myocardial infarction                 | 29                  | 0                             |
| Congestive heart failure              | 58                  | 0                             |
| Peripheral vascular disease           | 40                  | 0                             |
| Cerebrovascular disease               | 32                  | 0                             |
| Dementia                              | 3                   | 0                             |
| Chronic obstructive pulmonary disease | 45                  | 0                             |
| Rheumatic disease                     | 5                   | 0                             |
| Peptic ulcer disease                  | 8                   | 0                             |
| Hemiplegia                            | 4                   | 0                             |
| HIV/AIDS                              | <1                  | 0                             |
| Diabetes mellitus                     | 66                  | 0                             |
| Liver disease                         | 12                  | 0                             |
| Cancer                                | 26                  | 0                             |
| Hypertension                          | 45                  | 0                             |
| <b>Medications (%)</b>                |                     |                               |
| ACEIs/ARBs                            | 35                  | 0                             |
| Antidepressants                       | 20                  | 0                             |
| β-blockers                            | 53                  | 0                             |
| Calcium channel blockers              | 47                  | 0                             |

Supplemental material is neither peer-reviewed nor thoroughly edited by CJASN. The authors alone are responsible for the accuracy and presentation of the material.

|                                                       |          |             |
|-------------------------------------------------------|----------|-------------|
| Diuretics                                             | 56       | 0           |
| Statins                                               | 47       | 0           |
| Vasodilators                                          | 3        | 0           |
| Vitamin D analogs                                     | 22       | 0           |
| ESAs                                                  | 17       | 0           |
| <b>Laboratory parameters</b>                          |          |             |
| Serum albumin (g/dL)                                  | 3.3±0.6  | 10,759 (24) |
| Serum AST (U/L)                                       | 26±39    | 26,966 (60) |
| Serum ALT (U/L)                                       | 24±34    | 26,661 (59) |
| Serum BUN (mg/dL)                                     | 61±23    | 25,256 (56) |
| Serum creatinine (mg/dL)                              | 4.6±2.4  | 24,605 (55) |
| First eGFR (mL/min/1.73m <sup>2</sup> ) in the cohort | 44±24    | 15,117 (66) |
| Last eGFR (mL/min/1.73m <sup>2</sup> ) before ESRD    | 23±19    | 15,378 (66) |
| Serum phosphorus (mg/dL)                              | 5.1±1.3  | 34,931 (77) |
| Serum calcium (mg/dL)                                 | 8.8±0.7  | 25,918 (57) |
| Alkaline phosphatase (IU/L)                           | 98±66    | 27,351 (61) |
| Blood hemoglobin (g/dL)                               | 10.3±1.5 | 7,189 (16)  |
| Serum bicarbonate (mg/dL)                             | 23±4     | 25,789 (57) |
| Cholesterol (mg/dL)                                   | 155±50   | 29,456 (65) |
| Serum potassium (mEq/L)                               | 4.5±0.6  | 24,971 (55) |
| WBC (10 <sup>9</sup> /L)                              | 8±3      | 26,581 (59) |

Data are presented as number (percentage) or mean ± standard deviation. All laboratory results averaged over the 6-months pre-dialysis period.

Abbreviations: ACEI, angiotensin-converting enzyme inhibitor; AIDS: Acquired Immunodeficiency Syndrome; ARB, angiotensin receptor blocker; AST, aspartate aminotransferase; ALT, alanine aminotransferase; BUN, blood urea nitrogen; eGFR, estimated glomerular filtration rate; ESA, erythropoietin stimulating agent; ESRD: End Stage Renal Disease; HIV: Human Immunodeficiency Virus; N/A: not applicable; WBC, white blood cell.

**Supplemental Table 3:** Adjusted hazard ratios (95% CIs) for all-cause mortality in the first 12 months after dialysis initiation using different definitions of depression

|                            | <i>Definition of depression</i>        |                        |                                                            |                        |                                                            |                                            |                                         |
|----------------------------|----------------------------------------|------------------------|------------------------------------------------------------|------------------------|------------------------------------------------------------|--------------------------------------------|-----------------------------------------|
|                            | <i>Based on algorithm (main model)</i> |                        | <i>Based on algorithm and/or antidepressant medication</i> |                        | <i>Based on algorithm and/or antidepressant medication</i> |                                            |                                         |
|                            | Absence of depression                  | Presence of depression | Absence of depression                                      | Presence of depression | Absence of depression                                      | Depression with absence of pharmacotherapy | Depression treated with pharmacotherapy |
| <i>Patients</i>            | 34,622                                 | 10,454                 | 31,135                                                     | 13,941                 | 31,135                                                     | 5,000                                      | 8,941                                   |
| <i>Events</i>              | 10,220 (30)                            | 2,995 (29)             | 9,025 (29)                                                 | 4,190 (30)             | 9,025 (29)                                                 | 2,768 (55)                                 | 1,422 (16)                              |
| <i>Crude incident rate</i> | 358 (351-365)                          | 344 (332-357)          | 350 (343-357)                                              | 365 (354-376)          | 350 (343-357)                                              | 378 (364-393)                              | 341 (324-360)                           |
| <i>Unadjusted</i>          | 1                                      | 0.96                   | 1                                                          | 1.03                   | 1                                                          | 0.98                                       | 1.06                                    |
| <i>(N=41,582)</i>          | [reference]                            | (0.92–0.99)            | [reference]                                                | (0.99-1.07)            | [reference]                                                | (0.93-1.04)                                | (1.02-1.11)                             |
| <i>Model 1 (N=41,582)</i>  | 1                                      | 1.15                   | 1                                                          | 1.21                   | 1                                                          | 1.14                                       | 1.26                                    |
|                            | [reference]                            | (1.11–1.20)            | [reference]                                                | (1.17-1.26)            | [reference]                                                | (1.08-1.21)                                | (1.21-1.32)                             |
| <i>Model 2 (N=41,582)</i>  | 1                                      | 1.00                   | 1                                                          | 1.04                   | 1                                                          | 1.01                                       | 1.06                                    |
|                            | [reference]                            | (0.95–1.05)            | [reference]                                                | (0.99-1.08)            | [reference]                                                | (0.95-1.07)                                | (1.01-1.11)                             |
| <i>Model 3 (N=41,582)</i>  | 1                                      | 1.02                   | 1                                                          | 1.08                   | 1                                                          | 1.00                                       | 1.14                                    |
|                            | [reference]                            | (0.98–1.07)            | [reference]                                                | (1.04-1.13)            | [reference]                                                | (0.94-1.06)                                | (1.08-1.19)                             |
| <i>Model 4 (N=20,542)</i>  | 1                                      | 1.03                   | 1                                                          | 1.08                   | 1                                                          | 1.01                                       | 1.11                                    |
|                            | [reference]                            | (0.96–1.09)            | [reference]                                                | (1.02-1.14)            | [reference]                                                | (0.92-1.11)                                | (1.04-1.18)                             |

Data are presented as number (percentage) or hazard ratio (95% CI) unless otherwise specified. The crude incident rate presented in “per 1000 patient-years”.

Models are as follows:

Unadjusted model: only exposure variable included

Model 1 adjusted for age, sex, race/ethnicity, and marital status;

*Supplemental material is neither peer-reviewed nor thoroughly edited by CJASN. The authors alone are responsible for the accuracy and presentation of the material.*

Model 2 additionally accounted for comorbidities (dementia, myocardial infarction, congestive heart failure, peripheral vascular disease, connective tissue disease, lung disease, peptic ulcer disease, HIV, diabetes mellitus, stroke/paraplegia, liver disease, malignancy, hypertension), type of vascular access (arteriovenous fistula, arteriovenous graft, or catheter), estimated glomerular filtration rate slope before ESRD initiation, PTSD, substance abuse and number of mental health care and number of emergency department visits.

Model 3 additionally accounted for medications (phosphorous binder, active vitamin D, angiotensin-converting enzyme inhibitors/angiotensin receptor blockers, bicarbonate,  $\beta$ -blockers, calcium channel blockers, vasodilators, diuretics, statins, and erythropoietin stimulating agents),

Model 4 additionally accounted for blood hemoglobin, serum albumin, income and cardiovascular medication adherence

Abbreviations: CI: Confidence Interval; ESRD: End Stage Renal Disease; ICD-9-CM: International Classification of Diseases, Ninth Revision, Clinical Modification; HIV: Human Immunodeficiency Virus; PTSD: Post-Traumatic Stress Disorder

**Supplemental Table 4:** Adjusted hazard ratios (95% CIs) for all-cause mortality in the first 3 months after dialysis initiation using different definitions of depression

|                            | <i>Definition of depression</i>        |                        |                                                            |                        |                                                            |                                            |                                         |
|----------------------------|----------------------------------------|------------------------|------------------------------------------------------------|------------------------|------------------------------------------------------------|--------------------------------------------|-----------------------------------------|
|                            | <i>Based on algorithm (main model)</i> |                        | <i>Based on algorithm and/or antidepressant medication</i> |                        | <i>Based on algorithm and/or antidepressant medication</i> |                                            |                                         |
|                            | Absence of depression                  | Presence of depression | Absence of depression                                      | Presence of depression | Absence of depression                                      | Depression with absence of pharmacotherapy | Depression treated with pharmacotherapy |
| <i>Patients</i>            | 34,622                                 | 10,454                 | 31,135                                                     | 13,941                 | 31,135                                                     | 5,000                                      | 8,941                                   |
| <i>Events</i>              | 3,814 (11)                             | 1,131 (11)             | 3,373 (11)                                                 | 1,572 (11)             | 9,373 (11)                                                 | 525 (11)                                   | 1,047 (12)                              |
| <i>Crude incident rate</i> | 466 (451-481)                          | 458 (432-485)          | 458 (442-473)                                              | 479 (455-503)          | 458 (442-473)                                              | 443 (407-483)                              | 498 (469-529)                           |
| <i>Unadjusted</i>          | 1                                      | 0.98                   | 1                                                          | 1.03                   | 1                                                          | 0.97                                       | 1.07                                    |
| <i>(N=41,582)</i>          | [reference]                            | (0.91–1.04)            | [reference]                                                | (0.97-1.10)            | [reference]                                                | (0.88-1.06)                                | (0.99-1.15)                             |
| <i>Model 1 (N=41,582)</i>  | 1                                      | 1.19                   | 1                                                          | 1.22                   | 1                                                          | 1.13                                       | 1.29                                    |
|                            | [reference]                            | (1.11–1.27)            | [reference]                                                | (1.15-1.30)            | [reference]                                                | (1.03-1.24)                                | (1.20-1.38)                             |
| <i>Model 2 (N=41,582)</i>  | 1                                      | 1.02                   | 1                                                          | 1.05                   | 1                                                          | 0.99                                       | 1.08                                    |
|                            | [reference]                            | (0.95–1.10)            | [reference]                                                | (0.98-1.12)            | [reference]                                                | (0.90-1.09)                                | (1.01-1.17)                             |
| <i>Model 3 (N=41,582)</i>  | 1                                      | 1.05                   | 1                                                          | 1.09                   | 1                                                          | 0.98                                       | 1.16                                    |
|                            | [reference]                            | (0.97–1.13)            | [reference]                                                | (1.02-1.16)            | [reference]                                                | (0.90-1.00)                                | (1.07-1.25)                             |
| <i>Model 4 (N=20,542)</i>  | 1                                      | 1.09                   | 1                                                          | 1.10                   | 1                                                          | 1.01                                       | 1.14                                    |
|                            | [reference]                            | (0.98–1.21)            | [reference]                                                | (1.00-1.21)            | [reference]                                                | (0.87-1.18)                                | (1.03-1.26)                             |

Data are presented as number (percentage) or hazard ratio (95% CI) unless otherwise specified. The crude incident rate presented in “per 1000 patient-years”.

Models are as follows:

Unadjusted model: only exposure variable included

Model 1 adjusted for age, sex, race/ethnicity, and marital status;

Model 2 additionally accounted for comorbidities (dementia, myocardial infarction, congestive heart failure, peripheral vascular disease, connective tissue disease, lung disease, peptic ulcer disease, HIV, diabetes mellitus, stroke/paraplegia, liver disease,

*Supplemental material is neither peer-reviewed nor thoroughly edited by CJASN. The authors alone are responsible for the accuracy and presentation of the material.*

malignancy, hypertension), type of vascular access (arteriovenous fistula, arteriovenous graft, or catheter), estimated glomerular filtration rate slope before ESRD initiation, PTSD, substance abuse and number of mental health care and number of emergency department visits.

Model 3 additionally accounted for medications (phosphorous binder, active vitamin D, angiotensin-converting enzyme inhibitors/angiotensin receptor blockers, bicarbonate,  $\beta$ -blockers, calcium channel blockers, vasodilators, diuretics, statins, and erythropoietin stimulating agents),

Model 4 additionally accounted for blood hemoglobin, serum albumin, income and cardiovascular medication adherence

Abbreviations: CI: Confidence Interval; ESRD: End Stage Renal Disease; ICD-9-CM: International Classification of Diseases, Ninth Revision, Clinical Modification; HIV: Human Immunodeficiency Virus; PTSD: Post-Traumatic Stress Disorder

**Supplemental Table 5:** Adjusted hazard ratios (95% CIs) for all-cause mortality in the first 6 months after dialysis initiation using different definitions of depression

|                            | <i>Definition of depression</i>        |                        |                                                            |                        |                                                            |                                            |                                         |
|----------------------------|----------------------------------------|------------------------|------------------------------------------------------------|------------------------|------------------------------------------------------------|--------------------------------------------|-----------------------------------------|
|                            | <i>Based on algorithm (main model)</i> |                        | <i>Based on algorithm and/or antidepressant medication</i> |                        | <i>Based on algorithm and/or antidepressant medication</i> |                                            |                                         |
|                            | Absence of depression                  | Presence of depression | Absence of depression                                      | Presence of depression | Absence of depression                                      | Depression with absence of pharmacotherapy | Depression treated with pharmacotherapy |
| <i>Patients</i>            | 34,622                                 | 10,454                 | 31,135                                                     | 13,941                 | 31,135                                                     | 5,000                                      | 8,941                                   |
| <i>Events</i>              | 6,576 (19)                             | 1,900 (18)             | 5,827 (19)                                                 | 2,649 (19)             | 5,827 (19)                                                 | 918 (18)                                   | 1,731 (19)                              |
| <i>Crude incident rate</i> | 424 (414-435)                          | 405 (387-423)          | 417 (407-428)                                              | 425 (410-442)          | 417 (407-428)                                              | 409 (383-436)                              | 435 (415-456)                           |
| <i>Unadjusted</i>          | 1                                      | 0.95                   | 1                                                          | 1.01                   | 1                                                          | 0.98                                       | 1.02                                    |
| <i>(N=41,582)</i>          | [reference]                            | (0.90–0.99)            | [reference]                                                | (0.96-1.06)            | [reference]                                                | (0.91-1.05)                                | (0.97-1.08)                             |
| <i>Model 1 (N=41,582)</i>  | 1                                      | 1.15                   | 1                                                          | 1.19                   | 1                                                          | 1.14                                       | 1.22                                    |
|                            | [reference]                            | (1.09–1.21)            | [reference]                                                | (1.13-1.25)            | [reference]                                                | (1.06-1.23)                                | (1.15-1.29)                             |
| <i>Model 2 (N=41,582)</i>  | 1                                      | 0.98                   | 1                                                          | 1.01                   | 1                                                          | 1.00                                       | 1.02                                    |
|                            | [reference]                            | (0.93–1.04)            | [reference]                                                | (0.96-1.07)            | [reference]                                                | (0.93-1.07)                                | (0.97-1.09)                             |
| <i>Model 3 (N=41,582)</i>  | 1                                      | 1.01                   | 1                                                          | 1.05                   | 1                                                          | 0.99                                       | 1.10                                    |
|                            | [reference]                            | (0.95–1.07)            | [reference]                                                | (1.00-1.11)            | [reference]                                                | (0.92-1.07)                                | (1.03-1.17)                             |
| <i>Model 4 (N=20,542)</i>  | 1                                      | 1.03                   | 1                                                          | 1.07                   | 1                                                          | 1.00                                       | 1.09                                    |
|                            | [reference]                            | (0.95–1.12)            | [reference]                                                | (0.99-1.15)            | [reference]                                                | (0.90-1.13)                                | (1.01-1.18)                             |

Data are presented as number (percentage) or hazard ratio (95% CI) unless otherwise specified. The crude incident rate presented in “per 1000 patient-years”.

Models are as follows:

Unadjusted model: only exposure variable included

Model 1 adjusted for age, sex, race/ethnicity, and marital status;

Model 2 additionally accounted for comorbidities (dementia, myocardial infarction, congestive heart failure, peripheral vascular disease, connective tissue disease, lung disease, peptic ulcer disease, HIV, diabetes mellitus, stroke/paraplegia, liver disease,



*Supplemental material is neither peer-reviewed nor thoroughly edited by CJASN. The authors alone are responsible for the accuracy and presentation of the material.*

malignancy, hypertension), type of vascular access (arteriovenous fistula, arteriovenous graft, or catheter), estimated glomerular filtration rate slope before ESRD initiation, PTSD, substance abuse and number of mental health care and number of emergency department visits.

Model 3 additionally accounted for medications (phosphorous binder, active vitamin D, angiotensin-converting enzyme inhibitors/angiotensin receptor blockers, bicarbonate,  $\beta$ -blockers, calcium channel blockers, vasodilators, diuretics, statins, and erythropoietin stimulating agents),

Model 4 additionally accounted for blood hemoglobin, serum albumin, income and cardiovascular medication adherence

Abbreviations: CI: Confidence Interval; ESRD: End Stage Renal Disease; ICD-9-CM: International Classification of Diseases, Ninth Revision, Clinical Modification; HIV: Human Immunodeficiency Virus; PTSD: Post-Traumatic Stress Disorder

**SUPPLEMENTAL FIGURE LEGENDS**

**Supplemental Figure 1:** Probability of all-cause mortality of patients with and without depression in the first 12 months after dialysis initiation using different definitions of depression: Panel A shows the definition based on only ICD-9-CM code; Panel B shows definition based on ICD-9-CM code and/or antidepressant medication and Panel C shows definition based on ICD-9-CM code and/or antidepressant medication separated by treatment

**Supplemental Figure 1 Panel A:**

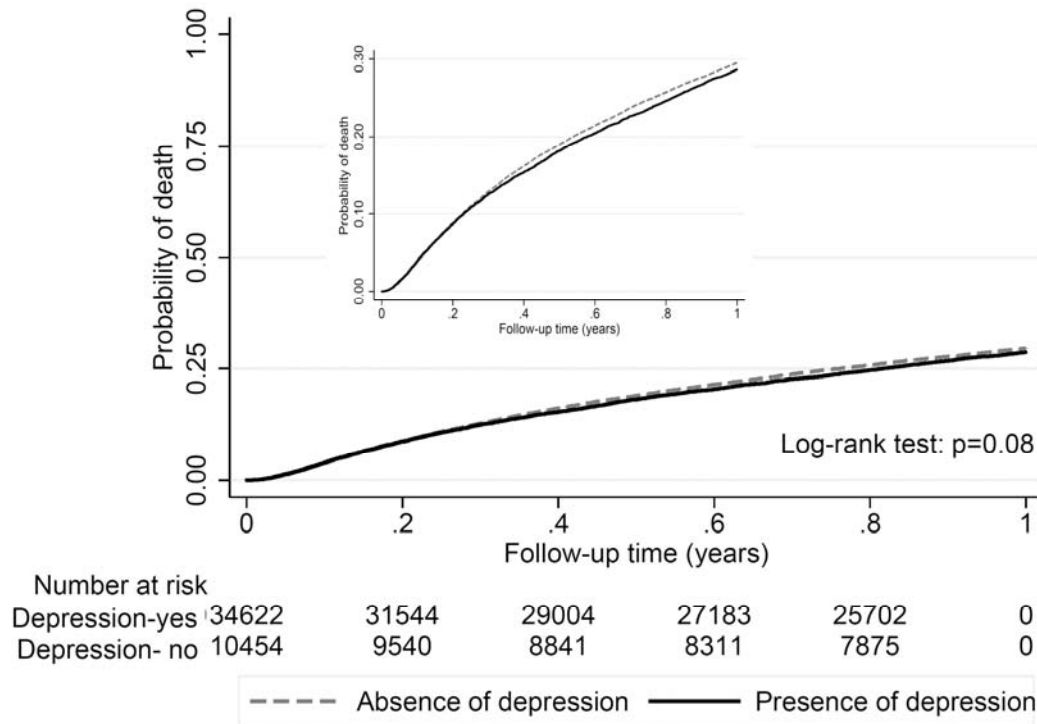

**Supplemental Figure 1 Panel B:**

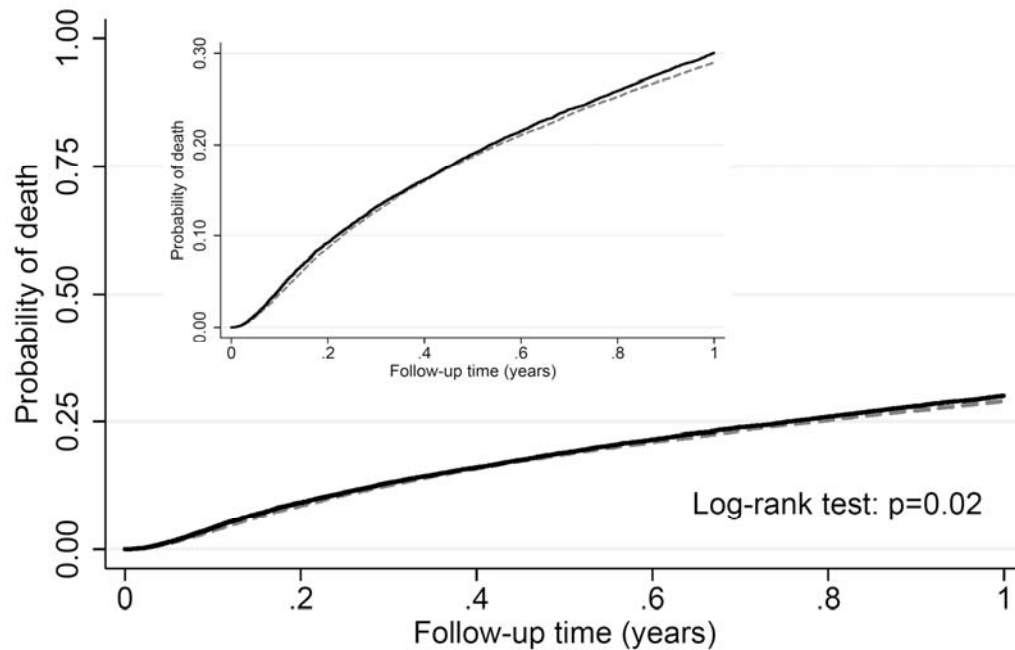

| Number at risk   |       | 0     | .2    | .4    | .6    | .8 | 1 |
|------------------|-------|-------|-------|-------|-------|----|---|
| Depression - yes | 31135 | 28432 | 26157 | 24560 | 23254 | 0  | 0 |
| Depression - no  | 13941 | 12652 | 11688 | 10934 | 10323 | 0  | 0 |

- - - - Absence of depression    — Presence of depression

**Supplemental Figure 1 Panel C:**

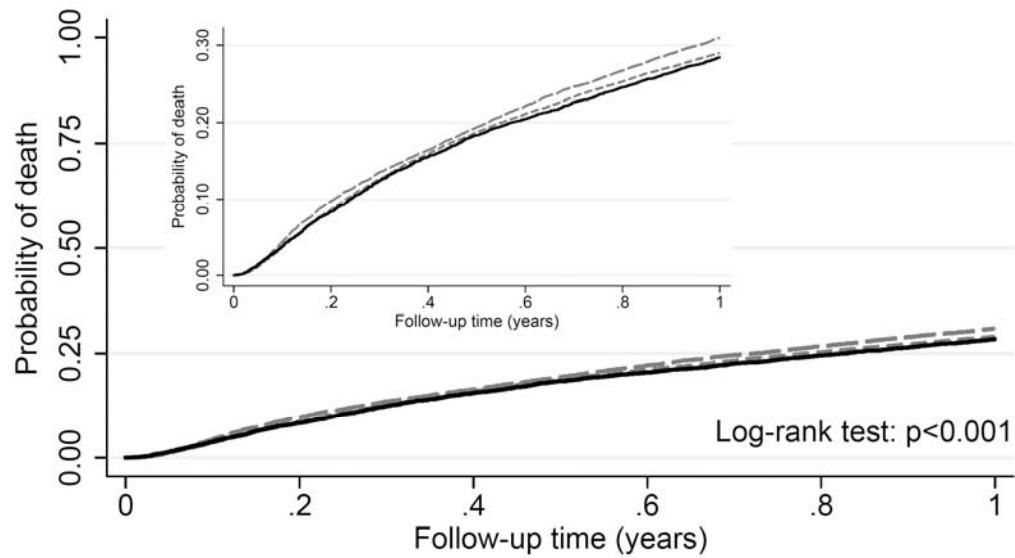

| Number at risk |       |       |       |       |       |   |
|----------------|-------|-------|-------|-------|-------|---|
| Depression-yes | 31135 | 28432 | 26157 | 24560 | 23254 | 0 |
| Depr. on meds  | 8941  | 8071  | 7468  | 6958  | 6551  | 0 |
| Depr. no meds  | 5000  | 4581  | 4220  | 3976  | 3772  | 0 |

  

|     |                              |       |                          |
|-----|------------------------------|-------|--------------------------|
| --- | Absence of depression        | - · - | Depression on medication |
| —   | Depression not on medication |       |                          |
